# Supplementary material
Source: PubMed Central journal article supplement (PMC2755554)
Supplement: NIHMS143636-supplement-supplementary1.pdf [file NIHMS143636-supplement-supplementary1.pdf]

### **Supplemental materials/movies**

S1. A movie of the yeast type I Hsp40 Ydj1 and the peptide substrate complex dimer structure. Ydj1 dimer is in blue and the bound peptide substrate is in red.

S2. A movie of the yeast type II Hsp40 Sis1 crystal structure. The Sis1 dimer is in silver.
